# Supplementary material for: High performance BaBiScCo hollow fibre membranes for oxygen transport
Source: Royal Society of Chemistry journal article supplement (doi:10.1039/c1ee01180d), 2011-01-01
Supplement: c1ee01180d.pdf [file c1ee01180d.pdf]

## Supplementary Information

### High Performance BaBiScCo Hollow Fibre Membranes for Oxygen Transport

Jaka Sunarso, Shaomin Liu, Yue Sheng Lin and João C. Diniz da Costa

#### ESI-1. Energy of Activation

The energy of activation is shown in Figure S1. In this calculation, we normalised all O<sub>2</sub> fluxes to the same driving force and used an experimentally fitted simplified version of the Wagner equation (1) and  $n=0.25$ <sup>1,2,3</sup>:

$$J_{O_2} = \alpha [p_{O_2}^{\prime -n} - p_{O_2}^{\prime\prime -n}] \quad (1)$$

where  $J_{O_2}$  represents the oxygen flux,  $\alpha$  is constant,  $n$  is the controlling steps for oxygen transport,  $p'_{O_2}$  (21 kPa) and  $p''_{O_2}$  (1 kPa) the oxygen partial pressure at the feed and permeate sides, respectively.

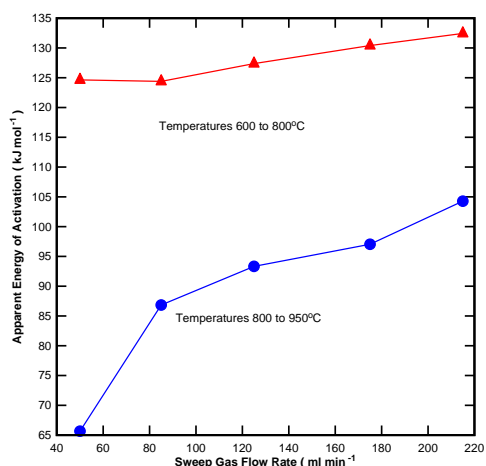

Figure S1. Energy of activation versus the sweep gas flow rate.

#### ESI – 2. The effect of the O<sub>2</sub> partial pressure

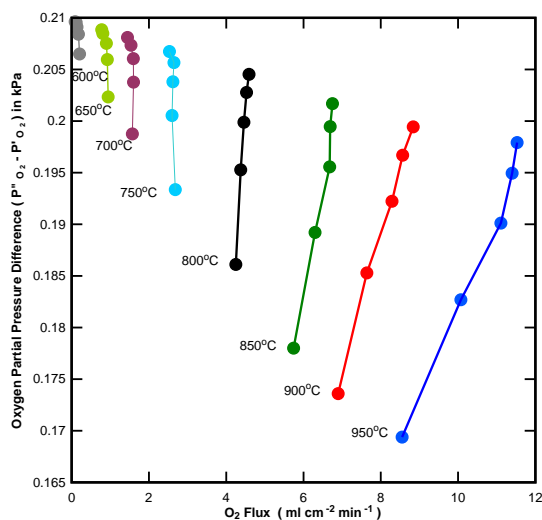

Figure S2. Effect of O<sub>2</sub> pressure difference on O<sub>2</sub> fluxes

<sup>1</sup> T. Schiestel, M. Kilgus, S. Peter, K.J. Caspary, H. Wang and J. Caro, *J. Membr. Sci.*, 2005, **258**, 1.

<sup>2</sup> X. Qi, Y.S. Lin, S.L. Swartz, *Ind. Eng. Chem. Res.*, 2000, **39**, 646.

<sup>3</sup> T. Tablet, G. Grubert, H. Wang, T. Schiestel, M. Schroeder, B. Langanke, J. Caro, *Catal. Today*, 2005, **104**, 126.
